# Supplementary material for: Inhibition of Leishmania infantum Trypanothione Reductase by New Aminopropanone Derivatives Interacting with the NADPH Binding Site
Source: MDPI journal article supplement (doi:10.3390/molecules28010338), 2023-01-01
Supplement: s1 [file s1]

# Inhibition of *Leishmania infantum* Trypanothione Reductase by New Aminopropanone Derivatives Interacting with the NADPH Binding Site

Valentina Noemi Madia <sup>1</sup>, Davide Ialongo <sup>1</sup>, Elisa Patacchini <sup>1</sup>, Cécile Exertier <sup>2</sup>, Lorenzo Antonelli <sup>2,3</sup>, Gianni Colotti <sup>2</sup>, Antonella Messori <sup>1</sup>, Valeria Tudino <sup>1</sup>, Francesco Saccoliti <sup>4</sup>, Luigi Scipione <sup>1</sup>, Andrea Ilari <sup>2,\*</sup>, Roberta Costi <sup>1,\*</sup> and Roberto Di Santo <sup>1</sup>

<sup>1</sup> Istituto Pasteur-Fondazione Cenci Bolognetti, Dipartimento di Chimica e Tecnologie del Farmaco, "Sapienza" Università di Roma, p.le Aldo Moro 5, I-00185 Rome, Italy; valentinanoemi.madia@uniroma1.it (V.N.M.); davide.ialongo@uniroma1.it (D.I.); elisa.patacchini@uniroma1.it (E.P.); antonella.messori@uniroma1.it (A.M.); valeria.tudino@gmail.com (V.T.); luigi.scipione@uniroma1.it (L.S.); roberta.costi@uniroma1.it (R.C.); roberto.disanto@uniroma1.it (R.D.S.)

<sup>2</sup> Istituto di Biologia e Patologia Molecolari del CNR c/o Dipartimento di Scienze Biochimiche, Sapienza Università di Roma, p.le Aldo Moro 5, Roma, Italy; andrea.ilari@cnr.it (A.I.); Cécile Exertier cecile.exertier@uniroma1.it (C. E.); gianni.colotti@cnr.it (G.C.)

<sup>3</sup> Dipartimento di Scienze Biochimiche, Sapienza Università di Roma, p.le Aldo Moro 5, Roma

<sup>4</sup> D3 PharmaChemistry, Italian Institute of Technology, Via Morego 30, 16163, Genova (Italy); francesco.saccoliti@iit.it (F.S.)

## Contents

Figure S1: Conformations of compound **1**.

Figure S2: Conformation of compound **2a**;

Figure S3: Conformation of compound **2c**;

Figure S4: Conformation of compound **2d**;

Figure S5: Conformation of compound **2e**;

Figure S6: Conformation of compound **2f**;

Figure S7: Conformation of compound **3a**;

Figure S8: Conformation of compound **3b**;

Figure S9: Conformation of compound **3c**.

Figure S10: Inhibition kinetics of the glutathione reductase in the presence of compound **2b**.

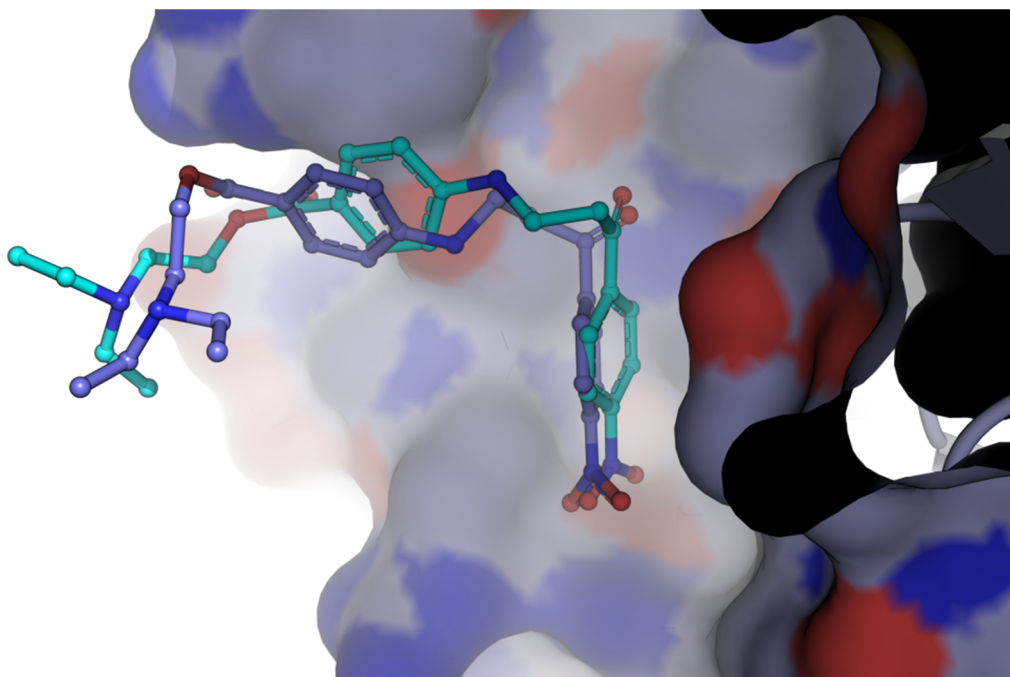

**Figure S1:** Superposition of crystal structure of compound **1** (medium blue) with the conformation generated by re-docking procedure for the same ligand (light blue).

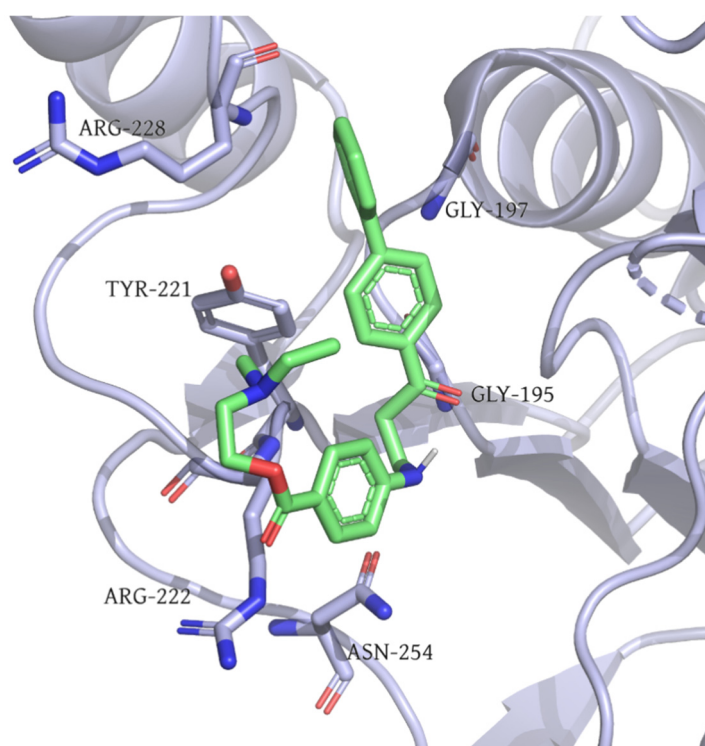

**Figure S2:** Conformation of compound **2a** with the lowest energy in the most populated cluster.

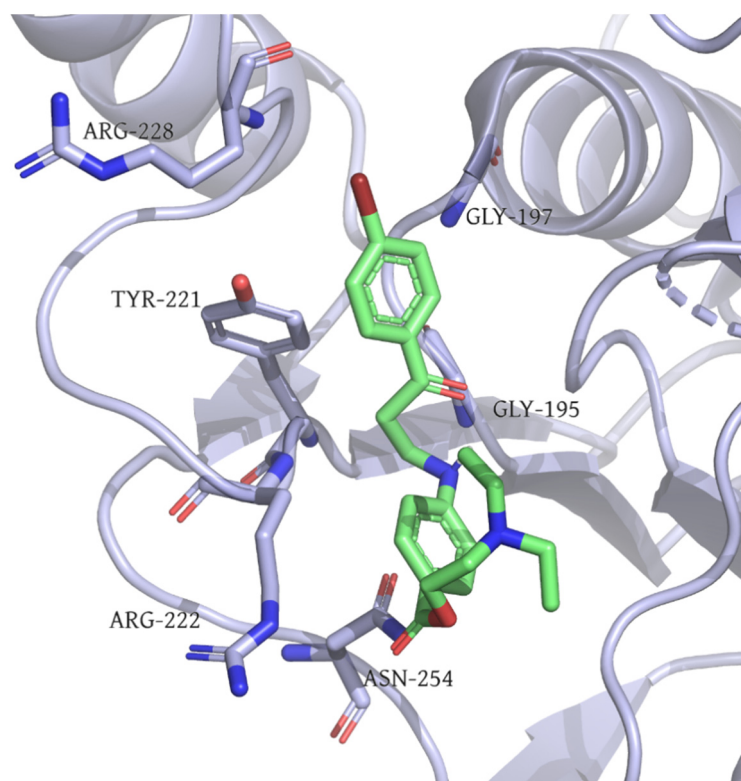

**Figure S3:** Conformation of compound **2c** with the lowest energy in the most populated cluster.

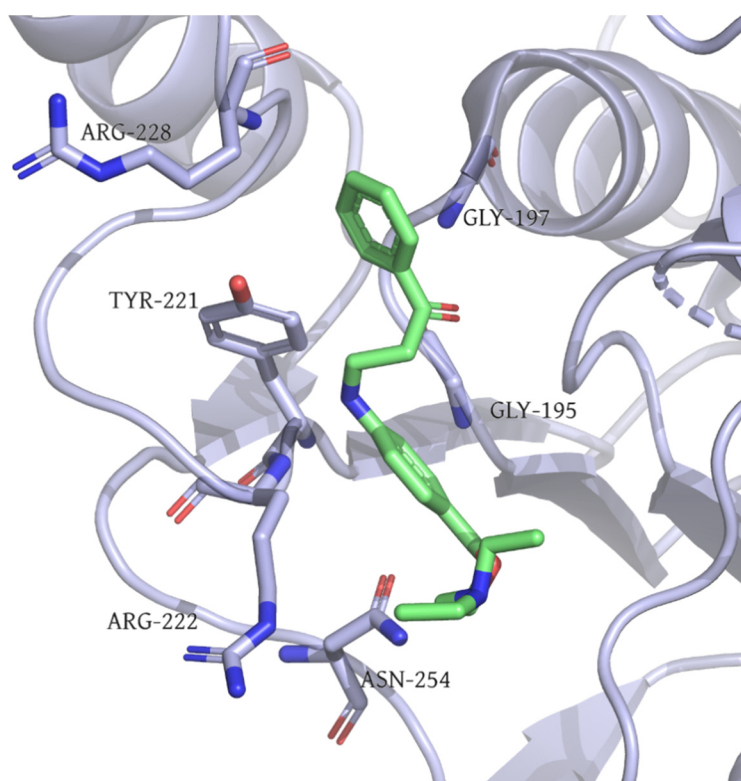

**Figure S4:** Conformation of compound **2d** with the lowest energy in the most populated cluster.

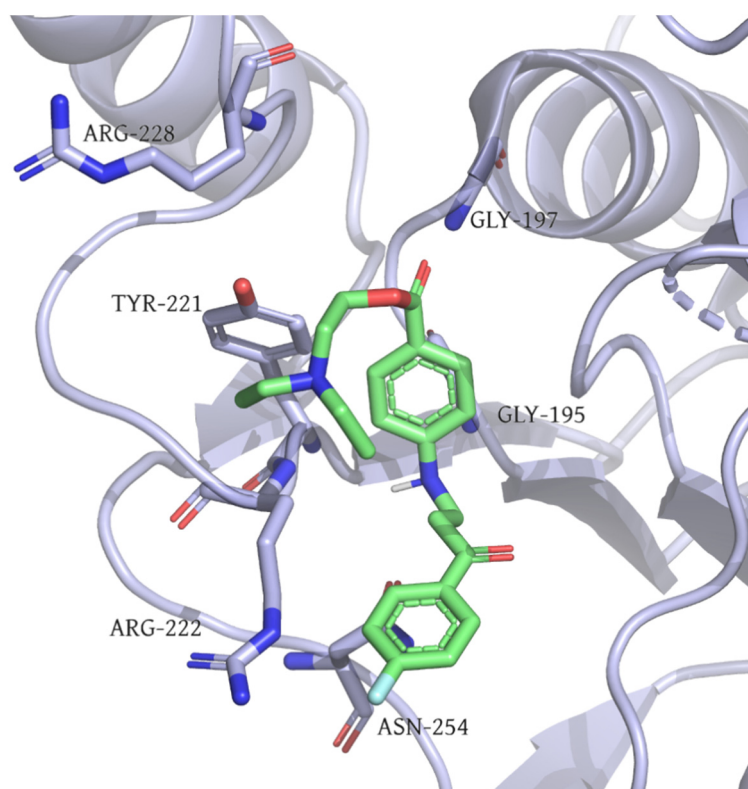

**Figure S5:** Conformation of compound 2e with the lowest energy in the most populated cluster.

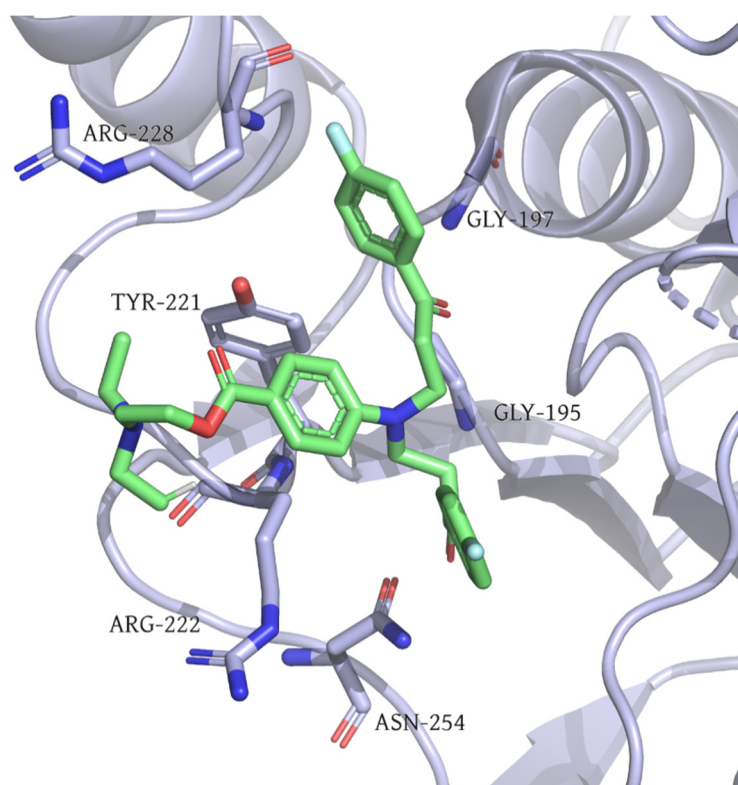

**Figure S6:** Conformation of compound 2f with the lowest energy in the most populated cluster.

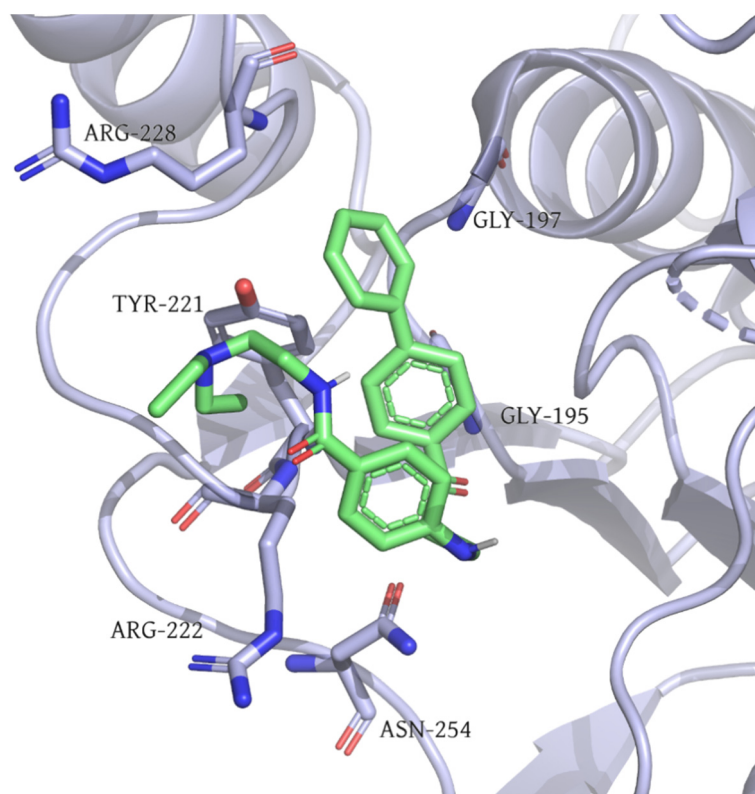

**Figure S7:** Conformation of compound **3a** with the lowest energy in the most populated cluster.

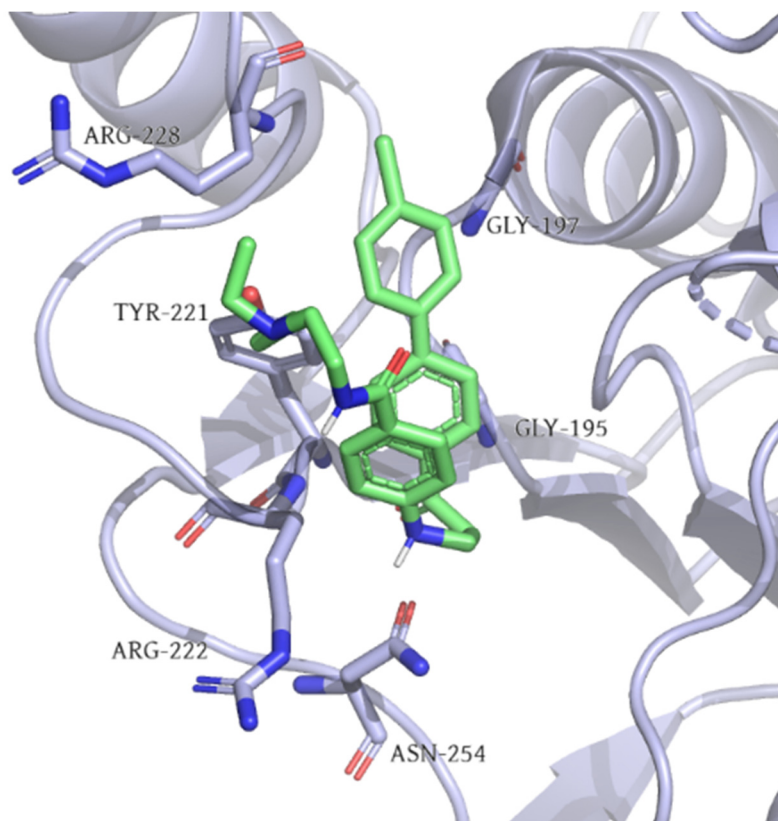

**Figure S8:** Conformation of compound **3b** with the lowest energy in the most populated cluster.



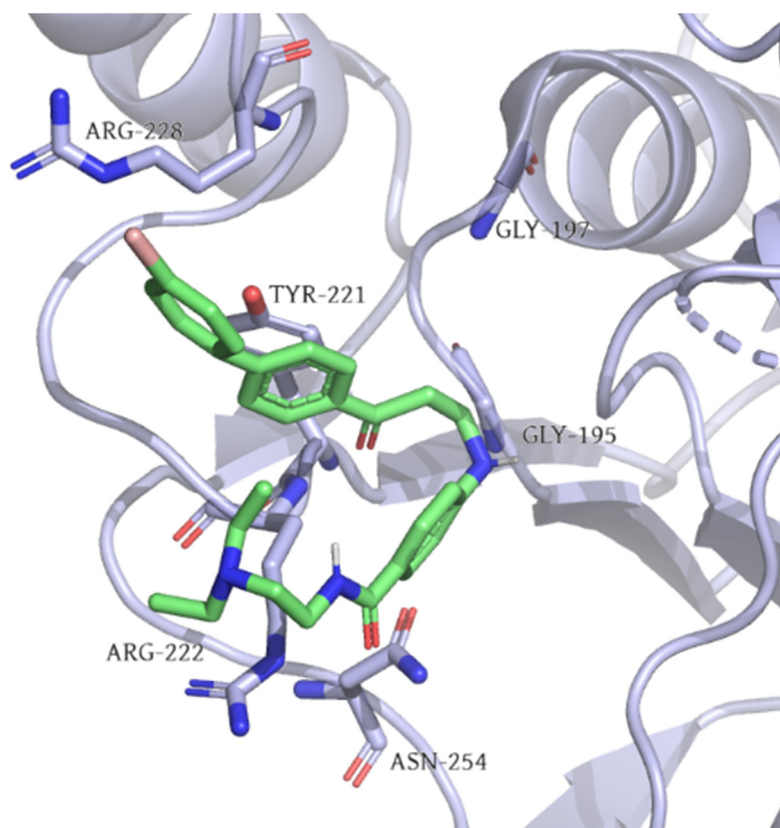

**Figure S9:** Conformation of compound **3c** with the lowest energy in the most populated cluster.

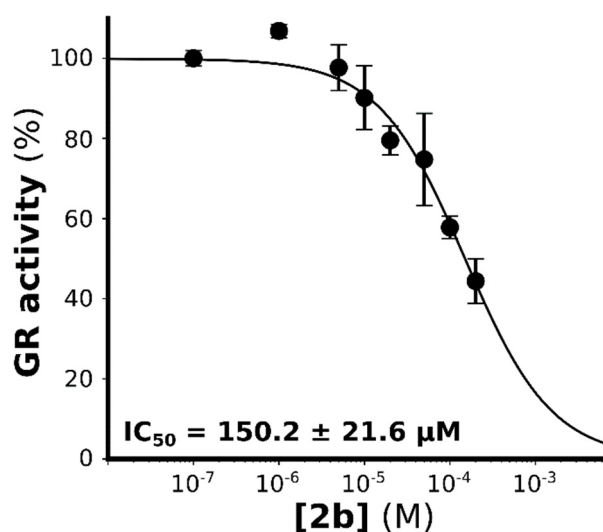

**Figure S10.** Inhibition kinetics of the glutathione reductase in the presence of compound **2b**. Inhibition assays were performed at 25 °C using a JASCO V650 spectrophotometer equipped with a JASCO EHC-716 Peltier unit. Glutathione Reductase (GR) 50 nM, (purchased from Sigma Aldrich) was mixed with varying concentrations of compound **2b** (0.1 to 200 μM) and 150 μM oxidized glutathione in 50 mM HEPES pH 7.4, 40 mM NaCl; and incubated at 25°C for 3 minutes. The reaction was started upon addition of 100 μM NADPH. Oxidation of NADPH was followed as a decrease in absorbance at 340 nm. GR activity was determined as  $V_0(\text{compound})/V_0(\text{control}) \times 100$  where  $V_0$  is the initial velocity. The  $IC_{50}$  was determined using a dose response logistic equation defined by the Kaleidagraph software as  $y_{min} + (y_{max} - y_{min}) / (1 + (x/IC_{50})^{\text{slope}})$ .
